# Supplementary material for: Diversity and Expression of Bacterial Metacaspases in an Aquatic Ecosystem
Source: Front Microbiol. 2016 Jul 6;7:1043. doi: 10.3389/fmicb.2016.01043 (PMC4933709; doi:10.3389/fmicb.2016.01043)
Supplement: Supplementary file 4 [file Table4.XLS]

## Sheet: TableS4
Supplementary Table 4
All members of the Nodularia spumigena hierarchical clustering metacaspase gene expression clusters. The best blastn hit versus the sequenced genome of Nodularia spumigena CCY9414 is provided. When multiple hits share the best score, all those genes are displayed as multiple rows per SeqId. The metacaspase genes are emphasized with a bold magenta font.
Cluster	SeqId	KeggId	KeggDefinition	BestHitGenes	BestHitAnnotation
M31	contig_539573_26_1780_+	K01239	iunH; purine nucleosidase [EC:3.2.2.1]	NSP_26150	Inosine-uridine preferring nucleoside hydrolase
M31	contig_417025_1717_2010_+	K00324	pntA; NAD(P) transhydrogenase subunit alpha [EC:1.6.1.2]	NSP_30830	NAD(P) transhydrogenase alpha subunit
M31	contig_416581_1188_1337_+	NA	NA	NSP_20310	Type I restriction-modification system, specificity subunit S
M31	contig_429246_115_864_+	K07024	K07024	NSP_21420	Sucrose-phosphatase
M31	contig_538634_1528_1776_+	NA	NA	NSP_18060	hypothetical protein
M31	contig_584193_91_957_+	K04037	chlL; light-independent protochlorophyllide reductase subunit L [EC:1.3.7.7]	NSP_32180	Light-independent protochlorophyllide reductase iron-sulfur ATP-binding protein ChlL
M31	contig_407767_1_654_-	NA	NA	NSP_37310	hypothetical protein
M31	contig_627174_3545_5110_+	K08482	kaiC; circadian clock protein KaiC	NSP_45070	Circadian clock protein KaiC
M31	contig_503235_4837_8898_+	K03046	rpoC; DNA-directed RNA polymerase subunit beta' [EC:2.7.7.6]	NSP_9290	DNA-directed RNA polymerase delta (beta'') subunit
M31	contig_424723_589_1386_-	K03651	icc; Icc protein	NSP_46480	3',5'-cyclic-nucleotide phosphodiesterase
M31	contig_540211_1041_2360_-	NA	NA	NSP_23560	hypothetical protein
M31	contig_460428_1_839_+	NA	NA	NSP_11800	Ubiquinone biosynthesis monooxygenase UbiB
M31	contig_506728_1529_2135_-	NA	NA	NSP_17410	putative with similarity to BchE, but NOT Mg-protoporphyrin monomethyl ester cyclase (anaerobic)
M31	contig_420726_1038_1721_-	NA	NA	NSP_43340	TPR repeat protein
M31	contig_428953_1_3483_+	K16128	mcyD; microcystin synthetase protein McyD	NSP_42160	Malonyl CoA-acyl carrier protein transacylase
M31	contig_543525_173_895_+	NA	NA	NSP_5010	hypothetical protein
M31	contig_712072_767_1618_+	K06971	K06971	NSP_1970	photosystem I biogenesis protein BtpA
M31	contig_430444_93_626_-	NA	NA	NSP_15720	hypothetical protein
M31	contig_404259_89_891_+	NA	NA	NSP_13290	WD-40 repeat protein
M31	contig_585649_232_1257_+	NA	NA	NSP_10310	hypothetical protein
M32	contig_545731_1_324_+	NA	NA	NSP_19010	RNA-binding protein
M32	contig_429329_1978_3336_-	NA	NA	NSP_49270	WD40 repeat protein
M32	contig_619121_537_830_+	NA	NA	NSP_27530	hypothetical protein
M32	contig_550141_11_1273_-	K01256	pepN; aminopeptidase N [EC:3.4.11.2]	NSP_38410	aminopeptidase
M32	contig_459412_1_675_+	NA	NA	NSP_2880	hypothetical protein
M32	contig_458654_79_888_+	NA	NA	NSP_34120	hypothetical protein
M32	contig_538608_2837_4132_-	K01756	purB, ADSL; adenylosuccinate lyase [EC:4.3.2.2]	NSP_5200	Adenylosuccinate lyase
M32	contig_416264_142_1167_+	K02012	afuA, fbpA; iron(III) transport system substrate-binding protein	NSP_19110	ferric iron-binding periplasmic protein of ABC transporter
M32	contig_422242_454_1293_-	NA	NA	NSP_8670	hypothetical protein
M32	contig_625063_1698_3088_-	NA	NA	NSP_34270	hypothetical protein
M32	contig_585393_4868_5437_-	NA	NA	NSP_950	Na+-dependent transporters of the SNF family
M32	contig_540965_930_1520_+	K03559	exbD; biopolymer transport protein ExbD	NSP_36030	Biopolymer transport protein ExbD/TolR
M32	contig_691442_1523_2128_+	NA	NA	NSP_20590	hypothetical protein
M32	contig_459866_1_820_+	NA	NA	NSP_49370	Long-chain-fatty-acid--CoA ligase
M32	contig_506642_84_1928_+	K01868	TARS, thrS; threonyl-tRNA synthetase [EC:6.1.1.3]	NSP_44240	Threonyl-tRNA synthetase
M32	contig_639172_4124_4840_+	K01591	pyrF; orotidine-5'-phosphate decarboxylase [EC:4.1.1.23]	NSP_750	Orotidine 5'-phosphate decarboxylase
M32	contig_428846_400_969_-	NA	NA	NSP_36640	hypothetical protein
M32	contig_538748_1620_2504_+	K14540	rbgA; ribosome biogenesis GTPase A	NSP_40510	50S ribosomal subunit maturation GTPase RbgA
M32	contig_629870_4097_5578_+	NA	NA	NSP_49850	hypothetical protein
M32	contig_428759_3254_4054_-	K08700	ccmO; carbon dioxide concentrating mechanism protein CcmO	NSP_40370	Carbon dioxide concentrating mechanism protein CcmO
M32	contig_402130_100_1623_+	NA	NA	NSP_41500	hypothetical protein
M32	contig_429641_3135_3737_+	NA	NA	NSP_36010	hypothetical protein
M32	contig_629870_3460_3807_+	NA	NA	NSP_33740	ISSoc2, resolvase
M32	contig_629870_3460_3807_+	NA	NA	NSP_49890	hypothetical protein
M32	contig_421506_2189_3202_+	NA	NA	NSP_13110	serine/threonine kinase
M32	contig_458394_1_784_+	NA	NA	NSP_5310	Sigma-fimbriae chaperone protein
M32	contig_428720_1_1096_+	K04035	E1.14.13.81, acsF, chlE; magnesium-protoporphyrin IX monomethyl ester (oxidative) cyclase [EC:1.14.13.81]	NSP_4730	Mg protoporphyrin IX monomethyl ester oxidative cyclase (aerobic)
M32	contig_530734_1_595_-	NA	NA	NSP_37320	hypothetical protein
M32	contig_532130_38_637_+	NA	NA	NSP_12040	hypothetical protein
M32	contig_479426_53_946_+	NA	NA	NSP_21350	hypothetical protein
M32	contig_505814_1_738_-	K07496	K07496; putative transposase	NSP_11250	Transposase, IS605 OrfB
M32	contig_505814_1_738_-	K07496	K07496; putative transposase	NSP_2110	Transposase, IS605 OrfB
M32	contig_505814_1_738_-	K07496	K07496; putative transposase	NSP_35370	Transposase, IS605 OrfB
M32	contig_505814_1_738_-	K07496	K07496; putative transposase	NSP_50210	transposase OrfB
M32	contig_420726_1_747_-	NA	NA	NSP_43360	TPR domain protein, putative component of TonB system
M32	contig_493203_1_763_+	K02066	mlaE, linK; phospholipid/cholesterol/gamma-HCH transport system permease protein	NSP_51650	ABC-type transport system involved in resistance to organic solvents, permease component
M32	contig_429049_3070_4254_+	K00005	gldA; glycerol dehydrogenase [EC:1.1.1.6]	NSP_33470	Glycerol dehydrogenase
M32	contig_541074_1_1473_+	K01255	CARP, pepA; leucyl aminopeptidase [EC:3.4.11.1]	NSP_29200	Cytosol aminopeptidase PepA
M32	contig_429775_1_1533_-	NA	NA	NSP_50820	Zinc-regulated outer membrane porin
M32	contig_508144_1_957_-	K00147	proA; glutamate-5-semialdehyde dehydrogenase [EC:1.2.1.41]	NSP_42280	Gamma-glutamyl phosphate reductase
M32	contig_415276_2106_2348_+	K02287	cpcD; phycocyanin-associated, rod	NSP_24930	Phycobilisome small rod capping linker polypeptide, phycocyanin-associated
M32	contig_503180_1701_3902_-	K00524	nrdJ; ribonucleotide reductase, class II [EC:1.17.4.1]	NSP_50490	Ribonucleotide reductase of class II (coenzyme B12-dependent)
M32	contig_503901_3624_4574_+	K01963	accD; acetyl-CoA carboxylase carboxyl transferase subunit beta [EC:6.4.1.2]	NSP_43290	Acetyl-coenzyme A carboxyl transferase beta chain
M32	contig_429442_1607_2305_+	NA	NA	NSP_28970	hypothetical protein
M32	contig_419533_821_1420_-	K00942	E2.7.4.8, gmk; guanylate kinase [EC:2.7.4.8]	NSP_40040	Guanylate kinase
M32	contig_430050_105_1151_+	K00214	BLVRA, bvdR; biliverdin reductase [EC:1.3.1.24]	NSP_33230	Biliverdin reductase
M32	contig_502778_279_1850_+	NA	NA	NSP_51560	hypothetical protein
M32	contig_429262_1_747_-	K07496	K07496; putative transposase	NSP_11250	Transposase, IS605 OrfB
M32	contig_429262_1_747_-	K07496	K07496; putative transposase	NSP_2110	Transposase, IS605 OrfB
M32	contig_429262_1_747_-	K07496	K07496; putative transposase	NSP_35370	Transposase, IS605 OrfB
M32	contig_429262_1_747_-	K07496	K07496; putative transposase	NSP_50210	transposase OrfB
M32	contig_416680_4332_4838_+	NA	NA	NSP_32080	hypothetical protein
M32	contig_428817_145_879_-	K00390	cysH; phosphoadenosine phosphosulfate reductase [EC:1.8.4.8]	NSP_30490	Phosphoadenylyl-sulfate reductase [thioredoxin]
M32	contig_677566_812_1534_-	NA	NA	NSP_7280	Sepiapterin reductase
M32	contig_660916_462_2420_+	K01873	VARS, valS; valyl-tRNA synthetase [EC:6.1.1.9]	NSP_4960	Valyl-tRNA synthetase
M32	contig_419503_2968_4170_+	K04487	iscS, NFS1; cysteine desulfurase [EC:2.8.1.7]	NSP_40680	Cysteine desulfurase, NifS subfamily
M32	contig_540966_157_1179_+	NA	NA	NSP_32880	hypothetical protein
M32	contig_562205_2418_2651_-	NA	NA	NSP_48690	Protein CP12, regulation of Calvin cycle via association/dissociation of PRK/CP12/GAPDH complex
M32	contig_628653_256_774_+	K01653	E2.2.1.6S, ilvH, ilvN; acetolactate synthase I/III small subunit [EC:2.2.1.6]	NSP_20200	Acetolactate synthase small subunit
M32	contig_428961_1_1517_-	NA	NA	NSP_8130	zinc protease
M32	contig_458694_130_808_+	NA	NA	NSP_18770	hypothetical protein
M32	contig_460928_325_709_-	NA	NA	NSP_48460	fdxN element excision controlling factor protein
M32	contig_710185_3018_3812_-	NA	NA	NSP_31370	hypothetical protein
M32	contig_405994_1_824_+	K01609	trpC; indole-3-glycerol phosphate synthase [EC:4.1.1.48]	NSP_36740	Indole-3-glycerol phosphate synthase
M32	contig_417456_138_1025_-	NA	NA	NSP_36690	DNA-binding response regulator, AraC family
M32	contig_368003_53_355_+	NA	NA	NSP_15270	hypothetical protein
M32	contig_368003_53_355_+	NA	NA	NSP_25900	hypothetical protein
M32	contig_368003_53_355_+	NA	NA	NSP_36420	hypothetical protein
M32	contig_368003_53_355_+	NA	NA	NSP_47050	hypothetical protein
M32	contig_368003_53_355_+	NA	NA	NSP_51830	hypothetical protein
M32	contig_429387_705_1214_-	NA	NA	NSP_37710	hypothetical protein
M32	contig_428934_387_815_+	K06166	phnG; alpha-D-ribose 1-methylphosphonate 5-triphosphate synthase subunit PhnG [EC:2.7.8.37]	NSP_7580	PhnG protein
M32	contig_540949_199_1194_+	K01990	ABC-2.A; ABC-2 type transport system ATP-binding protein	NSP_16450	ABC-type multidrug transport system, ATPase component
M32	contig_429799_131_1180_+	NA	NA	NSP_49970	Undecaprenyl-phosphate N-acetylglucosaminyl 1-phosphate transferase
M32	contig_429886_1_907_+	K01876	DARS, aspS; aspartyl-tRNA synthetase [EC:6.1.1.12]	NSP_5700	Aspartyl-tRNA synthetase Aspartyl-tRNA(Asn) synthetase unambiguous
M32	contig_635745_503_912_-	K02357	tsf, TSFM; elongation factor Ts	NSP_12990	Translation elongation factor Ts
M32	contig_430431_1_572_+	K03801	lipB; lipoyl(octanoyl) transferase [EC:2.3.1.181]	NSP_23480	Octanoate-[acyl-carrier-protein]-protein-N- octan oyltransferase
M32	contig_541680_1_285_-	K02591	nifK; nitrogenase molybdenum-iron protein beta chain [EC:1.18.6.1]	NSP_40800	Nitrogenase (molybdenum-iron) beta chain
M32	contig_603138_1_1630_+	NA	NA	NSP_53240	Serine/threonine protein kinase
M32	contig_509755_1_1807_-	NA	NA	NSP_27220	soluble guanylyl cyclase beta1
M32	contig_421208_2416_3014_+	NA	NA	NSP_27930	Type II secretory pathway, pseudopilin PulG
M32	contig_459824_1_1251_+	K02274	coxA; cytochrome c oxidase subunit I [EC:1.9.3.1]	NSP_970	Cytochrome c oxidase polypeptide I
M32	contig_541147_952_1998_-	NA	NA	NSP_23740	Hemolysins and proteins containing CBS domains
M32	contig_429242_69_839_-	K01814	hisA; phosphoribosylformimino-5-aminoimidazole carboxamide ribotide isomerase [EC:5.3.1.16]	NSP_18000	Phosphoribosylformimino-5-aminoimidazole carboxamide ribotide isomerase
M32	contig_584700_1867_3418_+	K01448	E3.5.1.28B, amiA, amiB, amiC; N-acetylmuramoyl-L-alanine amidase [EC:3.5.1.28]	NSP_18730	N-acetylmuramoyl-L-alanine amidase
M32	contig_689113_1_75_+	NA	NA	NSP_11250	Transposase, IS605 OrfB
M32	contig_689113_1_75_+	NA	NA	NSP_18890	Transposase, IS605 OrfB
M32	contig_689113_1_75_+	NA	NA	NSP_2110	Transposase, IS605 OrfB
M32	contig_689113_1_75_+	NA	NA	NSP_35370	Transposase, IS605 OrfB
M32	contig_689113_1_75_+	NA	NA	NSP_50210	transposase OrfB
M32	contig_689113_1_75_+	NA	NA	NSP_51750	Transposase, IS605 OrfB
M32	contig_418443_4932_5945_-	K00150	gap2; glyceraldehyde-3-phosphate dehydrogenase (NAD(P)) [EC:1.2.1.59]	NSP_47250	NADPH-dependent glyceraldehyde-3-phosphate dehydrogenase
M32	contig_540996_2027_2830_+	K02036	pstB; phosphate transport system ATP-binding protein [EC:3.6.3.27]	NSP_52630	Phosphate transport ATP-binding protein PstB
M32	contig_416111_271_1320_+	K03841	FBP, fbp; fructose-1,6-bisphosphatase I [EC:3.1.3.11]	NSP_50460	Fructose-1,6-bisphosphatase, type I
M32	contig_689561_141_476_-	K01602	rbcS; ribulose-bisphosphate carboxylase small chain [EC:4.1.1.39]	NSP_26240	Ribulose bisphosphate carboxylase small chain
M32	contig_585434_97_1746_+	NA	NA	NSP_14790	Bacterial cell division membrane protein
M32	contig_495762_1_261_+	K02719	psbU; photosystem II PsbU protein	NSP_2020	Photosystem II 12 kDa extrinsic protein (PsbU)
M32	contig_504400_812_4399_+	K00284	E1.4.7.1; glutamate synthase (ferredoxin) [EC:1.4.7.1]	NSP_10510	Ferredoxin-dependent glutamate synthase
M32	contig_429092_578_3153_+	NA	NA	NSP_29550	hypothetical protein
M32	contig_503166_3440_5470_+	K05577	ndhF; NAD(P)H-quinone oxidoreductase subunit 5 [EC:1.6.5.3]	NSP_11070	NADH dehydrogenase subunit 5, Involved in CO2 fixation
M32	contig_458831_1_1871_+	K00548	metH, MTR; 5-methyltetrahydrofolate--homocysteine methyltransferase [EC:2.1.1.13]	NSP_11580	5-methyltetrahydrofolate--homocysteine methyltransferase
M32	contig_463518_1_632_+	NA	NA	NSP_26320	Long-chain-fatty-acid--CoA ligase
M32	contig_687621_1_1065_-	K08884	K08884; serine/threonine protein kinase, bacterial [EC:2.7.11.1]	NSP_52870	hypothetical protein
M32	contig_427207_2276_3182_-	K00590	E2.1.1.113; site-specific DNA-methyltransferase (cytosine-N4-specific) [EC:2.1.1.113]	NSP_45510	PvuII DNA methyltransferase
M32	contig_504408_45_533_-	K01951	guaA, GMPS; GMP synthase (glutamine-hydrolysing) [EC:6.3.5.2]	NSP_48730	GMP synthase [glutamine-hydrolyzing]
M32	contig_429029_521_1657_-	K06162	phnM; alpha-D-ribose 1-methylphosphonate 5-triphosphate diphosphatase [EC:3.6.1.63]	NSP_7510	Metal-dependent hydrolase involved in phosphonate metabolism
M32	contig_561086_454_1192_+	K00974	cca; tRNA nucleotidyltransferase (CCA-adding enzyme) [EC:2.7.7.72 3.1.3.- 3.1.4.-]	NSP_46730	tRNA nucleotidyltransferase, CC-adding
M32	contig_591087_1_672_+	NA	NA	NSP_53380	hypothetical protein
M32	contig_421208_1_1329_+	K01733	thrC; threonine synthase [EC:4.2.3.1]	NSP_32720	Threonine synthase
M32	contig_591162_385_903_-	K03564	BCP, PRXQ, DOT5; peroxiredoxin Q/BCP [EC:1.11.1.15]	NSP_23500	Alkyl hydroperoxide reductase subunit C-like protein
M32	contig_429705_1980_3410_+	K02005	ABC.CD.TX; HlyD family secretion protein	NSP_32600	heterocyst specific ABC-transporter, membrane fusion protein DevB-like protein
M32	contig_503133_644_1555_+	K00241	sdhC, frdC; succinate dehydrogenase / fumarate reductase, cytochrome b subunit	NSP_21240	Putative succinate dehydrogenase cytochrome b subunit
M32	contig_612733_158_1000_+	NA	NA	NSP_43940	Membrane protease subunits, stomatin/prohibitin-like protein
M32	contig_584949_1_479_-	K02314	dnaB; replicative DNA helicase [EC:3.6.4.12]	NSP_51430	Replicative DNA helicase intein-containing
M32	contig_584479_798_1799_-	K02634	petA; apocytochrome f	NSP_51800	Cytochrome b6-f complex subunit, apocytochrome f
M32	contig_508115_1_739_+	NA	NA	NSP_42640	Membrane GTPase LepA
M32	contig_674988_1046_2068_-	K00133	asd; aspartate-semialdehyde dehydrogenase [EC:1.2.1.11]	NSP_48540	Aspartate-semialdehyde dehydrogenase
M32	contig_579789_84_527_+	NA	NA	NSP_41070	hypothetical protein
M32	contig_541257_226_1290_-	K00971	manC, cpsB; mannose-1-phosphate guanylyltransferase [EC:2.7.7.13]	NSP_11810	Mannose-1-phosphate guanylyltransferase (GDP)
M32	contig_540942_499_1368_+	NA	NA	NSP_14230	hypothetical protein
M32	contig_635019_1_727_-	NA	NA	NSP_32490	response regulator receiver domain protein (CheY-like)
M32	contig_428804_332_1036_-	NA	NA	NSP_2930	Chitooligosaccharide deacetylase
M32	contig_539981_216_1322_+	K03642	rlpA; rare lipoprotein A	NSP_31600	Rare lipoprotein A precursor
M32	contig_419730_394_1833_+	NA	NA	NSP_52660	Phosphomannomutase
M32	contig_686663_648_2276_-	K02837	prfC; peptide chain release factor 3	NSP_50750	Peptide chain release factor 3
M32	contig_428840_2110_3555_+	K01234	E3.2.1.135, nplT; neopullulanase [EC:3.2.1.135]	NSP_17870	Neopullulanase
M32	contig_636481_3073_4097_+	K11473	glcF; glycolate oxidase iron-sulfur subunit	NSP_18980	Glycolate dehydrogenase, iron-sulfur subunit GlcF
M32	contig_716474_1_653_+	K01358	clpP, CLPP; ATP-dependent Clp protease, protease subunit [EC:3.4.21.92]	NSP_17370	ATP-dependent Clp protease proteolytic subunit
M32	contig_419641_224_904_-	NA	NA	NSP_17490	hypothetical protein
M32	contig_429369_341_928_+	NA	NA	NSP_17900	hypothetical protein
M32	contig_501391_337_1465_+	K00240	sdhB, frdB; succinate dehydrogenase / fumarate reductase, iron-sulfur subunit [EC:1.3.5.1 1.3.5.4]	NSP_4130	Succinate dehydrogenase iron-sulfur protein
M32	contig_398888_1_1065_-	NA	NA	NSP_51490	Glycosyltransferase
M32	contig_689113_1398_2218_+	K02112	ATPF1B, atpD; F-type H+-transporting ATPase subunit beta [EC:3.6.3.14]	NSP_37380	ATP synthase beta chain
M32	contig_429641_2346_2942_-	NA	NA	NSP_36000	hypothetical protein
M32	contig_677566_3116_4156_-	K14330	K14330; fatty aldehyde-generating acyl-ACP reductase [EC:1.2.1.80]	NSP_7260	Acetylornithine aminotransferase
M32	contig_541083_1074_2729_+	K02035	ABC.PE.S; peptide/nickel transport system substrate-binding protein	NSP_1670	Oligopeptide ABC transporter, periplasmic substrate-binding component
M32	contig_495903_312_1182_+	K02025	ABC.MS.P; multiple sugar transport system permease protein	NSP_15630	sugar ABC transporter, permease protein
M32	contig_459824_2115_3055_+	NA	NA	NSP_53170	hypothetical protein
M32	contig_604964_4638_5947_+	K01256	pepN; aminopeptidase N [EC:3.4.11.2]	NSP_38410	aminopeptidase
M32	contig_429877_1_1150_+	NA	NA	NSP_30680	hypothetical protein
M32	contig_429504_1130_2314_+	NA	NA	NSP_42580	hypothetical protein
M32	contig_459271_165_1007_+	NA	NA	NSP_17140	hypothetical protein
M32	contig_693671_444_736_+	K09942	K09942; hypothetical protein	NSP_5760	Phosphate-binding protein
M32	contig_503047_1797_2861_+	K03856	AROA2, aroA; 3-deoxy-7-phosphoheptulonate synthase [EC:2.5.1.54]	NSP_38700	2-keto-3-deoxy-D-arabino-heptulosonate-7- phosphate synthase I beta
M32	contig_429735_644_1270_+	K06042	cobH-cbiC; precorrin-8X/cobalt-precorrin-8 methylmutase [EC:5.4.99.61 5.4.99.60]	NSP_48080	Cobalt-precorrin-8x methylmutase
M32	contig_430303_1012_1941_+	K02044	phnD; phosphonate transport system substrate-binding protein	NSP_35060	Phosphonate ABC transporter phosphate-binding periplasmic component
M32	contig_583751_2447_3868_+	NA	NA	NSP_13800	Beta-1,3-glucosyltransferase
M32	contig_429534_136_1098_+	K06282	hyaA, hybO; hydrogenase small subunit [EC:1.12.99.6]	NSP_41100	Uptake hydrogenase small subunit precursor
M32	contig_399471_1_739_+	K06048	ybdK; carboxylate-amine ligase [EC:6.3.-.-]	NSP_49630	Putative cytoplasmic protein
M32	contig_429210_1_873_+	NA	NA	NSP_24410	HEAT repeat protein
M32	contig_716911_972_2429_-	K08884	K08884; serine/threonine protein kinase, bacterial [EC:2.7.11.1]	NSP_32950	Protein kinase
M32	contig_423418_1_954_+	NA	NA	NSP_42240	Fe-S oxidoreductase
M32	contig_538748_1125_1493_+	NA	NA	NSP_40500	Glyoxalase/bleomycin resistance protein/dioxygenase
M32	contig_586528_4_642_-	NA	NA	NSP_14850	Alkyl hydroperoxide reductase subunit C-like protein
M32	contig_428934_3765_4535_+	K05781	phnK; putative phosphonate transport system ATP-binding protein	NSP_7530	Phosphonates transport ATP-binding protein PhnK
M32	contig_429931_101_541_+	NA	NA	NSP_16900	hypothetical protein
M32	contig_541946_222_803_-	K01494	dcd; dCTP deaminase [EC:3.5.4.13]	NSP_21170	Deoxycytidine triphosphate deaminase
M32	contig_541242_1_2116_+	K03580	hepA; ATP-dependent helicase HepA [EC:3.6.4.-]	NSP_39810	Superfamily II DNA/RNA helicase, SNF2 family
M32	contig_429203_1639_3749_+	NA	NA	NSP_23610	hypothetical protein
M32	contig_583782_1061_1528_-	NA	NA	NSP_29870	Chromosome segregation ATPase
M32	contig_421566_209_1531_+	K11954	K11954, natB; neutral amino acid transport system substrate-binding protein	NSP_24460	Branched-chain amino acid ABC transporter, amino acid-binding protein
M32	contig_415276_3962_4801_+	K02290	cpcG; phycobilisome rod-core linker protein	NSP_24960	Phycobilisome rod-core linker polypeptide, phycocyanin-associated
M32	contig_429667_16_1254_+	NA	NA	NSP_20670	Rhs family protein
M32	contig_421509_1420_3567_+	NA	NA	NSP_35330	Pentapeptide repeat family protein
M32	contig_548205_860_1936_-	K04035	E1.14.13.81, acsF, chlE; magnesium-protoporphyrin IX monomethyl ester (oxidative) cyclase [EC:1.14.13.81]	NSP_27960	Mg protoporphyrin IX monomethyl ester oxidative cyclase (aerobic)
M32	contig_540990_219_893_+	NA	NA	NSP_30660	hypothetical protein
M32	contig_419562_2482_2907_-	K03786	aroQ, qutE; 3-dehydroquinate dehydratase II [EC:4.2.1.10]	NSP_45670	3-dehydroquinate dehydratase II
M32	contig_503918_529_1326_-	NA	NA	NSP_32270	Queuosine Biosynthesis QueE Radical SAM
M32	contig_688035_1284_1787_+	NA	NA	NSP_30770	hypothetical protein
M32	contig_419730_1_287_-	NA	NA	NSP_52670	hypothetical protein
M32	contig_459228_75_1189_-	NA	NA	NSP_6350	Cyanophycinase
M32	contig_417333_1148_1609_-	NA	NA	NSP_37770	hypothetical protein
M32	contig_415276_3270_3866_+	K02289	cpcF; phycocyanobilin lyase beta subunit	NSP_24950	Phycocyanobilin lyase beta subunit
M32	contig_591387_1_1110_+	K02048	cysP, sbp; sulfate transport system substrate-binding protein	NSP_47720	Sulfate and thiosulfate binding protein CysP
M32	contig_400925_441_1154_-	NA	NA	NSP_9730	hypothetical protein
M32	contig_459848_386_966_+	NA	NA	NSP_31690	hypothetical protein
M32	contig_417522_2753_3166_+	K02114	ATPF1E, atpC; F-type H+-transporting ATPase subunit epsilon	NSP_37390	ATP synthase epsilon chain
M32	contig_430330_1_766_-	K06180	rluD; 23S rRNA pseudouridine1911/1915/1917 synthase [EC:5.4.99.23]	NSP_24880	Ribosomal large subunit pseudouridine synthase D
M32	contig_495659_1_325_+	NA	NA	NSP_50280	Microcompartments protein precursor
M32	contig_430023_400_1124_+	K01754	E4.3.1.19, ilvA, tdcB; threonine dehydratase [EC:4.3.1.19]	NSP_26420	Threonine dehydratase biosynthetic
M32	contig_430142_99_1334_-	K00799	GST, gst; glutathione S-transferase [EC:2.5.1.18]	NSP_11850	hypothetical protein
M32	contig_430196_642_1580_-	NA	NA	NSP_7740	TPR repeat
M32	contig_416096_771_1445_+	NA	NA	NSP_50630	hypothetical protein
M32	contig_548708_329_984_+	NA	NA	NSP_49850	hypothetical protein
M32	contig_403275_1_394_+	K07025	K07025; putative hydrolase of the HAD superfamily	NSP_46100	hypothetical protein
M32	contig_428817_984_2360_-	NA	NA	NSP_30500	Glucose-6-phosphate isomerase
M32	contig_404614_4050_5204_-	NA	NA	NSP_39400	Serine--glyoxylate aminotransferase
M32	contig_627174_5210_7471_+	K03287	TC.OMF; outer membrane factor, OMF family	NSP_45080	Outer membrane protein
M32	contig_417928_1203_1700_+	NA	NA	NSP_51150	hypothetical protein
M32	contig_430051_26_1936_+	K05577	ndhF; NAD(P)H-quinone oxidoreductase subunit 5 [EC:1.6.5.3]	NSP_40300	NADH dehydrogenase subunit 5, Involved in CO2 fixation
M32	contig_584598_128_481_-	K03559	exbD; biopolymer transport protein ExbD	NSP_31990	Biopolymer transport protein ExbD/TolR
M32	contig_676156_1258_2532_-	K08304	mltA; membrane-bound lytic murein transglycosylase A	NSP_31710	Membrane-bound lytic murein transglycosylase A precursor
M32	contig_580509_1_324_+	NA	NA	NSP_50690	hypothetical protein
M32	contig_457215_514_1122_-	NA	NA	NSP_31330	hypothetical protein
M32	contig_709565_3237_4826_-	K01991	ABC-2.OM, wza; polysaccharide export outer membrane protein	NSP_47400	Capsule polysaccharide export protein
M32	contig_429646_1275_1967_+	NA	NA	NSP_46970	hypothetical protein
M32	contig_430036_3916_4275_+	NA	NA	NA	NA
M32	contig_398321_162_663_+	K00852	rbsK, RBKS; ribokinase [EC:2.7.1.15]	NSP_52790	Ribokinase
M32	contig_458432_466_1812_-	K11754	folC; dihydrofolate synthase / folylpolyglutamate synthase [EC:6.3.2.12 6.3.2.17]	NSP_19760	Dihydrofolate synthase
M32	contig_538864_7141_7338_+	NA	NA	NSP_10090	hypothetical protein
M32	contig_397651_218_619_+	NA	NA	NSP_10380	hypothetical protein
M32	contig_583109_761_1270_-	K02097	apcF; phycobilisome core component	NSP_16170	Phycobilisome core component
M32	contig_402438_55_1512_+	NA	NA	NSP_44950	Selenoprotein O
M32	contig_418955_1759_3570_+	K01147	rnb; exoribonuclease II [EC:3.1.13.1]	NSP_34940	Exoribonuclease II
M32	contig_429959_676_2077_-	K01885	EARS, gltX; glutamyl-tRNA synthetase [EC:6.1.1.17]	NSP_20740	Glutamyl-tRNA synthetase Glutamyl-tRNA(Gln) synthetase unambiguous
M32	contig_429969_253_4239_-	K03403	chlH, bchH; magnesium chelatase subunit H [EC:6.6.1.1]	NSP_1080	Protoporphyrin IX Mg-chelatase subunit H
M32	contig_429219_1_1099_+	NA	NA	NSP_21900	hypothetical protein
M32	contig_457879_672_1010_-	K04751	glnB; nitrogen regulatory protein P-II 1	NSP_22000	Nitrogen regulatory protein P-II
M32	contig_624453_1_1165_+	NA	NA	NSP_3000	VCBS repeat domain protein
M32	contig_459092_1_4204_+	NA	NA	NSP_49230	Long-chain-fatty-acid--CoA ligase
M32	contig_116435_1_1198_+	NA	NA	NSP_29390	putative peptidase
M32	contig_467087_1_613_-	K07259	dacB; D-alanyl-D-alanine carboxypeptidase / D-alanyl-D-alanine-endopeptidase (penicillin-binding protein 4) [EC:3.4.16.4 3.4.21.-]	NSP_29050	D-alanyl-D-alanine carboxypeptidase
M32	contig_633887_1_1329_-	K02274	coxA; cytochrome c oxidase subunit I [EC:1.9.3.1]	NSP_41410	Cytochrome c oxidase polypeptide I
M32	contig_256285_309_1724_-	K01915	glnA, GLUL; glutamine synthetase [EC:6.3.1.2]	NSP_16180	Glutamine synthetase type I
M32	contig_428974_820_1008_+	K02724	psbZ; photosystem II PsbZ protein	NSP_44810	Photosystem II protein PsbZ
M32	contig_709994_3373_4332_+	NA	NA	NSP_10390	Zn-dependent protease with chaperone function
M32	contig_600116_1_969_-	K00540	E1.-.-.-	NSP_12120	Oxidoreductase-like protein
M32	contig_400190_225_1034_+	NA	NA	NSP_8440	hypothetical protein
M32	contig_644659_1_1512_+	NA	NA	NSP_32490	response regulator receiver domain protein (CheY-like)
M32	contig_459358_1_1120_+	K04038	chlN; light-independent protochlorophyllide reductase subunit N [EC:1.3.7.7]	NSP_32200	Light-independent protochlorophyllide reductase subunit N
M32	contig_457750_130_715_+	K03428	E2.1.1.11, chlM, bchM; magnesium-protoporphyrin O-methyltransferase [EC:2.1.1.11]	NSP_25110	Mg-protoporphyrin O-methyltransferase
M32	contig_419529_1845_2402_-	K01790	rfbC, rmlC; dTDP-4-dehydrorhamnose 3,5-epimerase [EC:5.1.3.13]	NSP_30610	dTDP-4-dehydrorhamnose 3,5-epimerase
M32	contig_430288_1_1084_+	K01599	hemE, UROD; uroporphyrinogen decarboxylase [EC:4.1.1.37]	NSP_34830	Uroporphyrinogen III decarboxylase
M32	contig_429931_1172_1872_+	K00008	SORD, gutB; L-iditol 2-dehydrogenase [EC:1.1.1.14]	NSP_16880	Sorbitol dehydrogenase
M32	contig_429072_1236_2492_-	K01465	URA4, pyrC; dihydroorotase [EC:3.5.2.3]	NSP_21790	Dihydroorotase
M32	contig_422269_2207_2569_-	NA	NA	NSP_12030	hypothetical protein
M32	contig_429083_87_1145_+	K06941	rlmN; 23S rRNA (adenine2503-C2)-methyltransferase [EC:2.1.1.192]	NSP_51390	Ribosomal RNA large subunit methyltransferase N
M32	contig_400405_431_1045_+	NA	NA	NSP_41370	hypothetical protein
M32	contig_411820_111_224_-	NA	NA	NA	NA
M32	contig_428877_1062_1790_-	NA	NA	NSP_46300	Enoyl-[acyl-carrier-protein] reductase [FMN], inferred for PFA pathway
M32	contig_624994_287_1966_+	K03321	TC.SULP; sulfate permease, SulP family	NSP_21590	Sulfate permease
M32	contig_535443_503_1451_-	K14393	actP; cation/acetate symporter	NSP_1320	Acetate permease ActP (cation/acetate symporter)
M32	contig_541036_345_1034_-	NA	NA	NSP_2840	hypothetical protein
M32	contig_548018_109_1116_-	K07119	K07119	NSP_16510	Putative NADP-dependent oxidoreductase
M32	contig_430196_2605_3217_+	K03501	gidB, rsmG; 16S rRNA (guanine527-N7)-methyltransferase [EC:2.1.1.170]	NSP_7760	rRNA small subunit methyltransferase, glucose inhibited division protein GidB
M32	contig_707381_951_1385_-	K07015	K07015	NSP_42460	Hydrolase, HAD subfamily IIIA
M32	contig_429455_1_705_+	NA	NA	NSP_4500	cell wall lytic activity lytE
M32	contig_430536_1_1521_+	NA	NA	NSP_1460	UDP-galactose-lipid carrier transferase
M32	contig_541053_18_953_+	K00507	SCD, desC; stearoyl-CoA desaturase (delta-9 desaturase) [EC:1.14.19.1]	NSP_3370	Fatty acid desaturase; Delta-9 fatty acid desaturase
M32	contig_590115_530_1273_+	NA	NA	NSP_30570	hypothetical protein
M32	contig_429509_653_1006_+	K06886	glbN; hemoglobin	NSP_40700	Cyanoglobin; Hemoglobin-like protein HbN
M32	contig_422944_1123_2184_-	K01710	E4.2.1.46, rfbB, rffG; dTDP-glucose 4,6-dehydratase [EC:4.2.1.46]	NSP_29650	dTDP-glucose 4,6-dehydratase
M32	contig_541228_336_853_+	K03526	E1.17.7.1, gcpE, ispG; (E)-4-hydroxy-3-methylbut-2-enyl-diphosphate synthase [EC:1.17.7.1]	NSP_20070	1-hydroxy-2-methyl-2-(E)-butenyl 4-diphosphate synthase
M32	contig_562205_2925_4102_+	NA	NA	NSP_36130	hypothetical protein
M32	contig_430102_405_962_+	K03564	BCP, PRXQ, DOT5; peroxiredoxin Q/BCP [EC:1.11.1.15]	NSP_22110	Alkyl hydroperoxide reductase subunit C-like protein
M32	contig_503608_2340_3668_+	K02274	coxA; cytochrome c oxidase subunit I [EC:1.9.3.1]	NSP_41410	Cytochrome c oxidase polypeptide I
M32	contig_429020_296_1370_-	K08325	yqhD; NADP-dependent alcohol dehydrogenase [EC:1.1.-.-]	NSP_46840	putative oxidoreductase YqhD
M32	contig_430614_1_709_+	K01704	leuD; 3-isopropylmalate/(R)-2-methylmalate dehydratase small subunit [EC:4.2.1.33 4.2.1.35]	NSP_42420	3-isopropylmalate dehydratase small subunit
M32	contig_675751_3297_4298_+	K02634	petA; apocytochrome f	NSP_51800	Cytochrome b6-f complex subunit, apocytochrome f
M32	contig_590859_67_471_-	K02650	pilA; type IV pilus assembly protein PilA	NA	NA
M32	contig_256185_2048_2446_+	NA	NA	NSP_26250	putative RuBisCo chaperonin RbcX
M32	contig_458519_245_1315_+	NA	NA	NSP_51760	sugar transferase
M32	contig_428910_3_617_-	NA	NA	NSP_19020	hypothetical protein
M32	contig_585629_1202_1849_-	NA	NA	NSP_52260	hypothetical protein
M32	contig_612457_759_1487_+	K09903	pyrH; uridylate kinase [EC:2.7.4.22]	NSP_13860	Uridylate kinase
M32	contig_421158_2076_2432_+	K13628	iscA, ISCA1; iron-sulfur cluster assembly protein	NSP_600	putative iron binding protein from the HesB_IscA_SufA family
M32	contig_503158_1806_2306_+	K02601	nusG; transcriptional antiterminator NusG	NSP_9390	Transcription antitermination protein NusG
M32	contig_457266_116_2575_+	K01890	FARSB, pheT; phenylalanyl-tRNA synthetase beta chain [EC:6.1.1.20]	NSP_15080	Phenylalanyl-tRNA synthetase beta chain
M32	contig_625550_1_1719_+	K02471	yddA; putative ATP-binding cassette transporter	NSP_49400	ABC transporter ATP-binding protein
M32	contig_503166_1242_1484_-	NA	NA	NA	NA
M32	contig_429594_643_1914_+	NA	NA	NSP_46060	Multimodular transpeptidase-transglycosylase
M32	contig_585526_598_1830_-	K07114	yfbK; Ca-activated chloride channel homolog	NSP_17390	putative membrane protein
M32	contig_429145_550_1512_+	NA	NA	NSP_43040	DnaJ-class molecular chaperone
M32	contig_429957_1_647_-	NA	NA	NSP_2400	hypothetical protein
M32	contig_428933_551_1267_-	NA	NA	NSP_46340	heterocyst glycolipid synthase
M32	contig_567963_1278_1676_-	K07491	K07491; putative transposase	NSP_12810	hypothetical protein
M32	contig_567963_1278_1676_-	K07491	K07491; putative transposase	NSP_14980	ISChy9, transposase orfA
M32	contig_567963_1278_1676_-	K07491	K07491; putative transposase	NSP_27890	hypothetical protein
M32	contig_567963_1278_1676_-	K07491	K07491; putative transposase	NSP_32740	hypothetical protein
M32	contig_567963_1278_1676_-	K07491	K07491; putative transposase	NSP_49740	hypothetical protein
M32	contig_417025_2061_3413_+	K00325	pntB; NAD(P) transhydrogenase subunit beta [EC:1.6.1.2]	NSP_30820	NAD(P) transhydrogenase subunit beta
M32	contig_540970_1_1672_+	NA	NA	NSP_31760	Diflavin flavoprotein A 1
M32	contig_540955_157_870_+	K02003	ABC.CD.A; putative ABC transport system ATP-binding protein	NSP_32570	Methionine ABC transporter ATP-binding protein
M32	contig_459780_2179_2832_+	NA	NA	NSP_850	hypothetical protein
M32	contig_458666_887_1438_-	K00759	APRT, apt; adenine phosphoribosyltransferase [EC:2.4.2.7]	NSP_52250	Adenine phosphoribosyltransferase
M32	contig_423706_435_1421_+	K01920	gshB, GSS; glutathione synthase [EC:6.3.2.3]	NSP_14350	Glutathione synthetase
M32	contig_328404_1_816_-	K10960	chlP, bchP; geranylgeranyl reductase [EC:1.3.1.83]	NSP_46210	Geranylgeranyl hydrogenase BchP; Geranylgeranyl reductase
M32	contig_585432_1_2087_+	K02666	pilQ; type IV pilus assembly protein PilQ	NSP_19820	Type II secretion outermembrane pore forming protein (PulD)
M32	contig_423706_83_349_+	K03676	grxC, GLRX, GLRX2; glutaredoxin 3	NSP_14360	Glutaredoxin 3 (Grx1)
M32	contig_457457_64_807_+	K06946	K06946	NSP_52030	putative GTPase
M32	contig_428759_4102_4899_-	K08699	ccmN; carbon dioxide concentrating mechanism protein CcmN	NSP_40360	Carboxysome protein CcmN
M32	contig_428901_1622_2188_+	NA	NA	NSP_38820	thioredoxin-like protein
M32	contig_540978_1463_2863_-	K01999	livK; branched-chain amino acid transport system substrate-binding protein	NSP_11020	hypothetical protein
M32	contig_428758_1986_2360_+	NA	NA	NSP_38380	Permeases of the major facilitator superfamily
M32	contig_504405_1_2015_+	K00937	ppk; polyphosphate kinase [EC:2.7.4.1]	NSP_10230	Polyphosphate kinase
M32	contig_537983_3682_4854_-	K11996	MOCS3, UBA4, moeB; adenylyltransferase and sulfurtransferase	NSP_43120	Sulfur carrier protein adenylyltransferase ThiF
M32	contig_540995_6248_7324_+	K00973	E2.7.7.24, rfbA, rffH; glucose-1-phosphate thymidylyltransferase [EC:2.7.7.24]	NSP_1760	Glucose-1-phosphate thymidylyltransferase
M32	contig_505808_188_565_+	NA	NA	NSP_44690	hypothetical protein
M32	contig_116201_1_255_-	NA	NA	NSP_32490	response regulator receiver domain protein (CheY-like)
M32	contig_537983_1510_2391_+	K11958	natE; neutral amino acid transport system ATP-binding protein	NSP_43090	Branched-chain amino acid transport ATP-binding protein LivF
M32	contig_503166_5683_6021_+	NA	NA	NSP_11080	NAD(P)H-quinone oxidoreductase subunit 4
M32	contig_624262_1_778_+	NA	NA	NSP_39980	PatU
M32	contig_428759_295_1719_+	K03312	gltS; glutamate:Na+ symporter, ESS family	NSP_40390	Sodium/glutamate symporter
M32	contig_429504_1_1019_+	NA	NA	NSP_42570	Permease of the drug/metabolite transporter (DMT) superfamily
M32	contig_646706_3484_4524_-	K04040	chlG, bchG; chlorophyll synthase [EC:2.5.1.62]	NSP_1890	Chlorophyll a synthase ChlG
M32	contig_429036_370_1461_+	K01090	E3.1.3.16; protein phosphatase [EC:3.1.3.16]	NSP_24260	Serine/threonine protein phosphatase
M32	contig_404620_1_971_+	K08325	yqhD; NADP-dependent alcohol dehydrogenase [EC:1.1.-.-]	NA	NA
M32	contig_627871_7548_8528_+	NA	NA	NSP_49440	Integrase
M33	contig_685097_2498_3154_-	K02601	nusG; transcriptional antiterminator NusG	NSP_9390	Transcription antitermination protein NusG
M33	contig_416200_7174_7728_+	K00939	adk, AK; adenylate kinase [EC:2.7.4.3]	NSP_43640	Adenylate kinase
M33	contig_502982_1849_3288_+	K00514	ZDS, crtQ; zeta-carotene desaturase [EC:1.3.5.6]	NSP_520	Pro-zeta-carotene desaturase, prolycopene producing
M33	contig_423044_2120_2647_-	NA	NA	NSP_33340	DnaJ protein
M33	contig_429638_1_1190_+	K01362	E3.4.21.-	NSP_24580	serine proteinase
M33	contig_585472_93_1592_-	K00764	purF, PPAT; amidophosphoribosyltransferase [EC:2.4.2.14]	NSP_52200	Amidophosphoribosyltransferase
M33	contig_400925_1303_2097_+	K06178	rluB; 23S rRNA pseudouridine2605 synthase [EC:5.4.99.22]	NSP_9740	Ribosomal small subunit pseudouridine synthase A
M33	contig_510039_1023_1451_-	K02274	coxA; cytochrome c oxidase subunit I [EC:1.9.3.1]	NSP_41410	Cytochrome c oxidase polypeptide I
M33	contig_429508_174_1616_+	K02293	PDS, crtP; 15-cis-phytoene desaturase [EC:1.3.5.5]	NSP_24500	Phytoene desaturase, pro-zeta-carotene producing
M33	contig_459723_2414_3547_+	NA	NA	NSP_40280	Low-affinity CO2 hydration protein CphX
M33	contig_426274_1810_2445_-	NA	NA	NSP_16810	hypothetical protein
M33	contig_537955_1285_2937_+	K04077	groEL, HSPD1; chaperonin GroEL	NSP_49480	Heat shock protein 60 family chaperone GroEL
M33	contig_419035_792_2711_+	K00392	sir; sulfite reductase (ferredoxin) [EC:1.8.7.1]	NSP_8370	Ferredoxin--sulfite reductase
M33	contig_708769_1326_2493_-	K03217	yidC, spoIIIJ, OXA1; YidC/Oxa1 family membrane protein insertase	NSP_30880	Inner membrane protein translocase component YidC, short form OxaI-like protein
M33	contig_639325_1500_3671_-	K08300	rne; ribonuclease E [EC:3.1.26.12]	NSP_10670	Ribonuclease E
M33	contig_543510_331_567_+	NA	NA	NSP_1480	hypothetical protein
M33	contig_590915_1329_2336_+	NA	NA	NSP_45910	hypothetical protein
M33	contig_419935_56_2029_+	K03149	thiG; thiazole synthase [EC:2.8.1.10]	NSP_25230	Glycine oxidase ThiO
M33	contig_503608_1293_2264_+	K02275	coxB; cytochrome c oxidase subunit II [EC:1.9.3.1]	NSP_41420	Cytochrome c oxidase polypeptide II
M33	contig_417605_1003_1671_+	NA	NA	NSP_52090	two-component response regulator
M33	contig_397893_22_265_+	NA	NA	NSP_13470	hypothetical protein
M33	contig_350936_463_1230_+	NA	NA	NSP_36790	Cleavage and polyadenylation specificity factor, 73 kDa subunit
M33	contig_424316_3634_4119_-	NA	NA	NSP_2140	Histone acetyltransferase HPA2
M33	contig_503710_3280_5106_+	K12574	rnj; ribonuclease J [EC:3.1.-.-]	NSP_48560	Zn-dependent hydrolase, RNA-metabolising
M33	contig_624449_5448_13704_-	K16129	mcyE; microcystin synthetase protein McyE	NSP_42180	Malonyl CoA-acyl carrier protein transacylase
M33	contig_430169_243_1277_+	NA	NA	NSP_28820	hypothetical protein
M33	contig_416827_1803_2294_+	K02109	ATPF0B, atpF; F-type H+-transporting ATPase subunit b	NSP_24180	ATP synthase B' chain
M33	contig_429717_2118_2373_+	NA	NA	NSP_6200	hypothetical protein
M33	contig_416200_9599_10546_+	K03040	rpoA; DNA-directed RNA polymerase subunit alpha [EC:2.7.7.6]	NSP_43590	DNA-directed RNA polymerase alpha subunit
M33	contig_424316_4135_4338_-	NA	NA	NSP_2150	hypothetical protein
M33	contig_416200_11005_11895_+	K06173	truA, PUS1; tRNA pseudouridine38-40 synthase [EC:5.4.99.12]	NSP_43570	tRNA pseudouridine synthase A
M33	contig_538864_2951_6049_+	K02519	infB, MTIF2; translation initiation factor IF-2	NSP_10070	Translation initiation factor 2
M33	contig_210261_1354_3432_+	K02355	fusA, GFM, EFG; elongation factor G	NSP_10590	Translation elongation factor G
M33	contig_423790_2128_2577_+	NA	NA	NSP_3690	hypothetical protein
M33	contig_539463_13_2169_+	K00962	pnp, PNPT1; polyribonucleotide nucleotidyltransferase [EC:2.7.7.8]	NSP_2490	Polyribonucleotide nucleotidyltransferase
M33	contig_210261_3455_4469_+	K02358	tuf, TUFM; elongation factor Tu	NSP_10600	Translation elongation factor Tu
M33	contig_503710_6456_6833_+	NA	NA	NSP_48580	hypothetical protein
M33	contig_416827_2409_2972_+	K02109	ATPF0B, atpF; F-type H+-transporting ATPase subunit b	NSP_24190	ATP synthase B chain
M33	contig_626702_1_2737_-	K02040	pstS; phosphate transport system substrate-binding protein	NSP_13310	Periplasmic binding protein
M33	contig_424316_2696_3454_-	NA	NA	NSP_2120	HEAT repeat protein
M33	contig_430218_798_1300_+	K01191	E3.2.1.24; alpha-mannosidase [EC:3.2.1.24]	NSP_26570	Alpha-mannosidase
M33	contig_457457_3264_3575_-	K04078	groES, HSPE1; chaperonin GroES	NSP_52060	Heat shock protein 60 family co-chaperone GroES
M33	contig_429971_1307_1955_-	K01626	E2.5.1.54, aroF, aroG, aroH; 3-deoxy-7-phosphoheptulonate synthase [EC:2.5.1.54]	NSP_38630	2-keto-3-deoxy-D-arabino-heptulosonate-7- phosphate synthase I alpha
M33	contig_689113_224_1138_+	NA	NA	NSP_37370	hypothetical protein
M33	contig_500907_865_1167_+	K03608	minE; cell division topological specificity factor	NSP_27700	Cell division topological specificity factor MinE
M33	contig_467110_1_811_-	NA	NA	NSP_6050	pleiotropic regulatory protein
M33	contig_429219_1205_1570_+	K00535	NA	NSP_21890	Ferredoxin
M33	contig_429386_267_2753_+	K00695	E2.4.1.13; sucrose synthase [EC:2.4.1.13]	NSP_24720	sucrose synthase
M33	contig_417522_33_947_+	NA	NA	NSP_37370	hypothetical protein
M33	contig_415522_1_1269_+	K03185	ubiH; 2-octaprenyl-6-methoxyphenol hydroxylase [EC:1.14.13.-]	NSP_51570	2-octaprenyl-6-methoxyphenol hydroxylase
M33	contig_675254_5466_7343_+	K03046	rpoC; DNA-directed RNA polymerase subunit beta' [EC:2.7.7.6]	NSP_9280	DNA-directed RNA polymerase gamma subunit
M33	contig_594970_94_579_+	K02095	apcD; allophycocyanin-B	NSP_52170	Allophycocyanin-B
M33	contig_541830_197_1677_+	K03596	lepA; GTP-binding protein LepA	NSP_6370	Translation elongation factor LepA
M33	contig_624451_1878_2807_-	K16134	mcyJ; microcystin synthetase protein McyJ	NSP_42170	methyltransferase, putative
M33	contig_428898_1162_2114_+	NA	NA	NSP_46300	Enoyl-[acyl-carrier-protein] reductase [FMN], inferred for PFA pathway
M33	contig_457457_1546_3029_-	K04077	groEL, HSPD1; chaperonin GroEL	NSP_52040	Heat shock protein 60 family chaperone GroEL
M33	contig_541158_83_1369_+	K11472	glcE; glycolate oxidase FAD binding subunit	NSP_19000	Glycolate dehydrogenase, FAD-binding subunit GlcE
M33	contig_422052_392_1910_+	K01869	LARS, leuS; leucyl-tRNA synthetase [EC:6.1.1.4]	NSP_1300	Leucyl-tRNA synthetase
M33	contig_710349_1_637_+	NA	NA	NSP_13040	hypothetical protein
M33	contig_424333_651_1172_+	NA	NA	NSP_42940	hypothetical protein
M33	contig_256528_136_1176_+	K11532	glpX-SEBP; fructose-1,6-bisphosphatase II / sedoheptulose-1,7-bisphosphatase [EC:3.1.3.11 3.1.3.37]	NSP_18160	Fructose-1,6-bisphosphatase, GlpX type
M33	contig_416827_1_445_+	K02116	atpI; ATP synthase protein I	NSP_24150	ATP synthase protein I
M33	contig_583841_681_1910_-	K02358	tuf, TUFM; elongation factor Tu	NSP_10600	Translation elongation factor Tu
M33	contig_694085_1423_2289_+	K01737	queD, ptpS, PTS; 6-pyruvoyltetrahydropterin/6-carboxytetrahydropterin synthase [EC:4.2.3.12 4.1.2.50]	NSP_8980	6-pyruvoyl tetrahydrobiopterin synthase
M33	contig_677566_4525_5250_-	K14331	K14331; fatty aldehyde decarbonylase [EC:4.1.99.5]	NSP_7250	cyanobacterial hypothetical protein
M33	contig_567963_17_1237_-	K14606	cruP; lycopene cyclase CruP [EC:5.5.1.19]	NSP_12800	Transposase, IS605 OrfB
M33	contig_508162_1_637_+	NA	NA	NSP_20430	Glutamate dehydrogenase/leucine dehydrogenase
M33	contig_503142_595_1941_-	K01945	purD; phosphoribosylamine--glycine ligase [EC:6.3.4.13]	NSP_38260	Phosphoribosylamine--glycine ligase
M33	contig_422557_920_1996_+	NA	NA	NSP_17420	Pili retraction protein pilT
M33	contig_426274_489_1388_+	NA	NA	NSP_16830	Main regulator of heterocyst differentiation HetR
M33	contig_422322_3096_4244_-	NA	NA	NSP_21180	cAMP-binding proteins - catabolite gene activator and regulatory subunit of cAMP-dependent protein kinase
M33	contig_432495_218_1428_+	NA	NA	NSP_48590	hypothetical protein
M33	contig_428933_1296_4050_-	NA	NA	NSP_46340	heterocyst glycolipid synthase
M33	contig_646706_5875_6066_-	NA	NA	NSP_1870	hypothetical protein
M33	contig_541914_308_604_+	NA	NA	NSP_38550	Ferredoxin
M33	contig_419562_3634_6306_-	K03168	topA; DNA topoisomerase I [EC:5.99.1.2]	NSP_45650	DNA topoisomerase I
M33	contig_115942_187_612_+	K09942	K09942; hypothetical protein	NSP_5760	Phosphate-binding protein
M33	contig_430410_1_910_-	K07315	rsbU; sigma-B regulation protein RsbU (phosphoserine phosphatase)	NSP_8730	Serine phosphatase RsbU, regulator of sigma subunit
